# Supplementary material
Source: PubMed Central journal article supplement (PMC3529373)
Supplement: supp_en.2012-1557_EN-12-1557_Supplemental_Data.pdf [file supp_en.2012-1557_EN-12-1557_Supplemental_Data.pdf]

**Supplemental Data for: Angiotensin II and III metabolism and effects on steroid production**

**in the HAC15 Human Adrenocortical Cell line.**

Kenji Oki, Phillip G Kopf, William B Campbell, Milay Luis Lam, Takeshi Yamazaki, Celso E Gomez-Sanchez, and Elise P Gomez-Sanchez

**PCR primers for ACE2, alanyl aminopeptidase and glutamyl aminopeptidase.**

**hACE2-F**, atatcagtcceaattggatgcctc

**hACE2-R**, atattctctgtgcatcccaggc

**hANPEP-F**, tcatcagcattaccaacaacg

**hANPEP-R**, tggatgaggttggagaaggag

**hENPEP-F**, tagcagagccattcaacactg

**hENPEP-R**, ttccagcacttggtccctagg

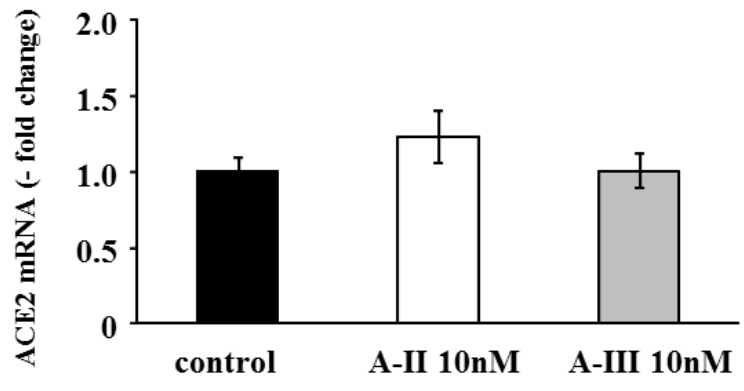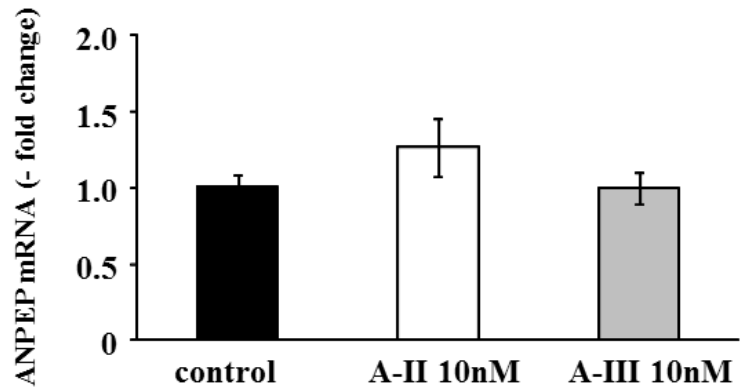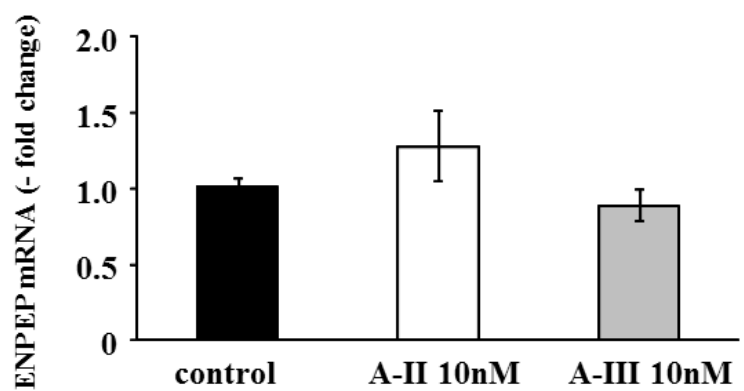

Supplemental Figure: mRNA expression of ACE2, alanyl aminopeptidase and glutamyl aminopeptidase and regulation by A-II and A-III.
